# Supplementary material for: Parasite Fate and Involvement of Infected Cells in the Induction of CD4+ and CD8+ T Cell Responses to Toxoplasma gondii
Source: PubMed Central journal article supplement (PMC3983043; doi:10.1371/journal.ppat.1004047), 2014-04-10

A mCherry+Violet+ parasites

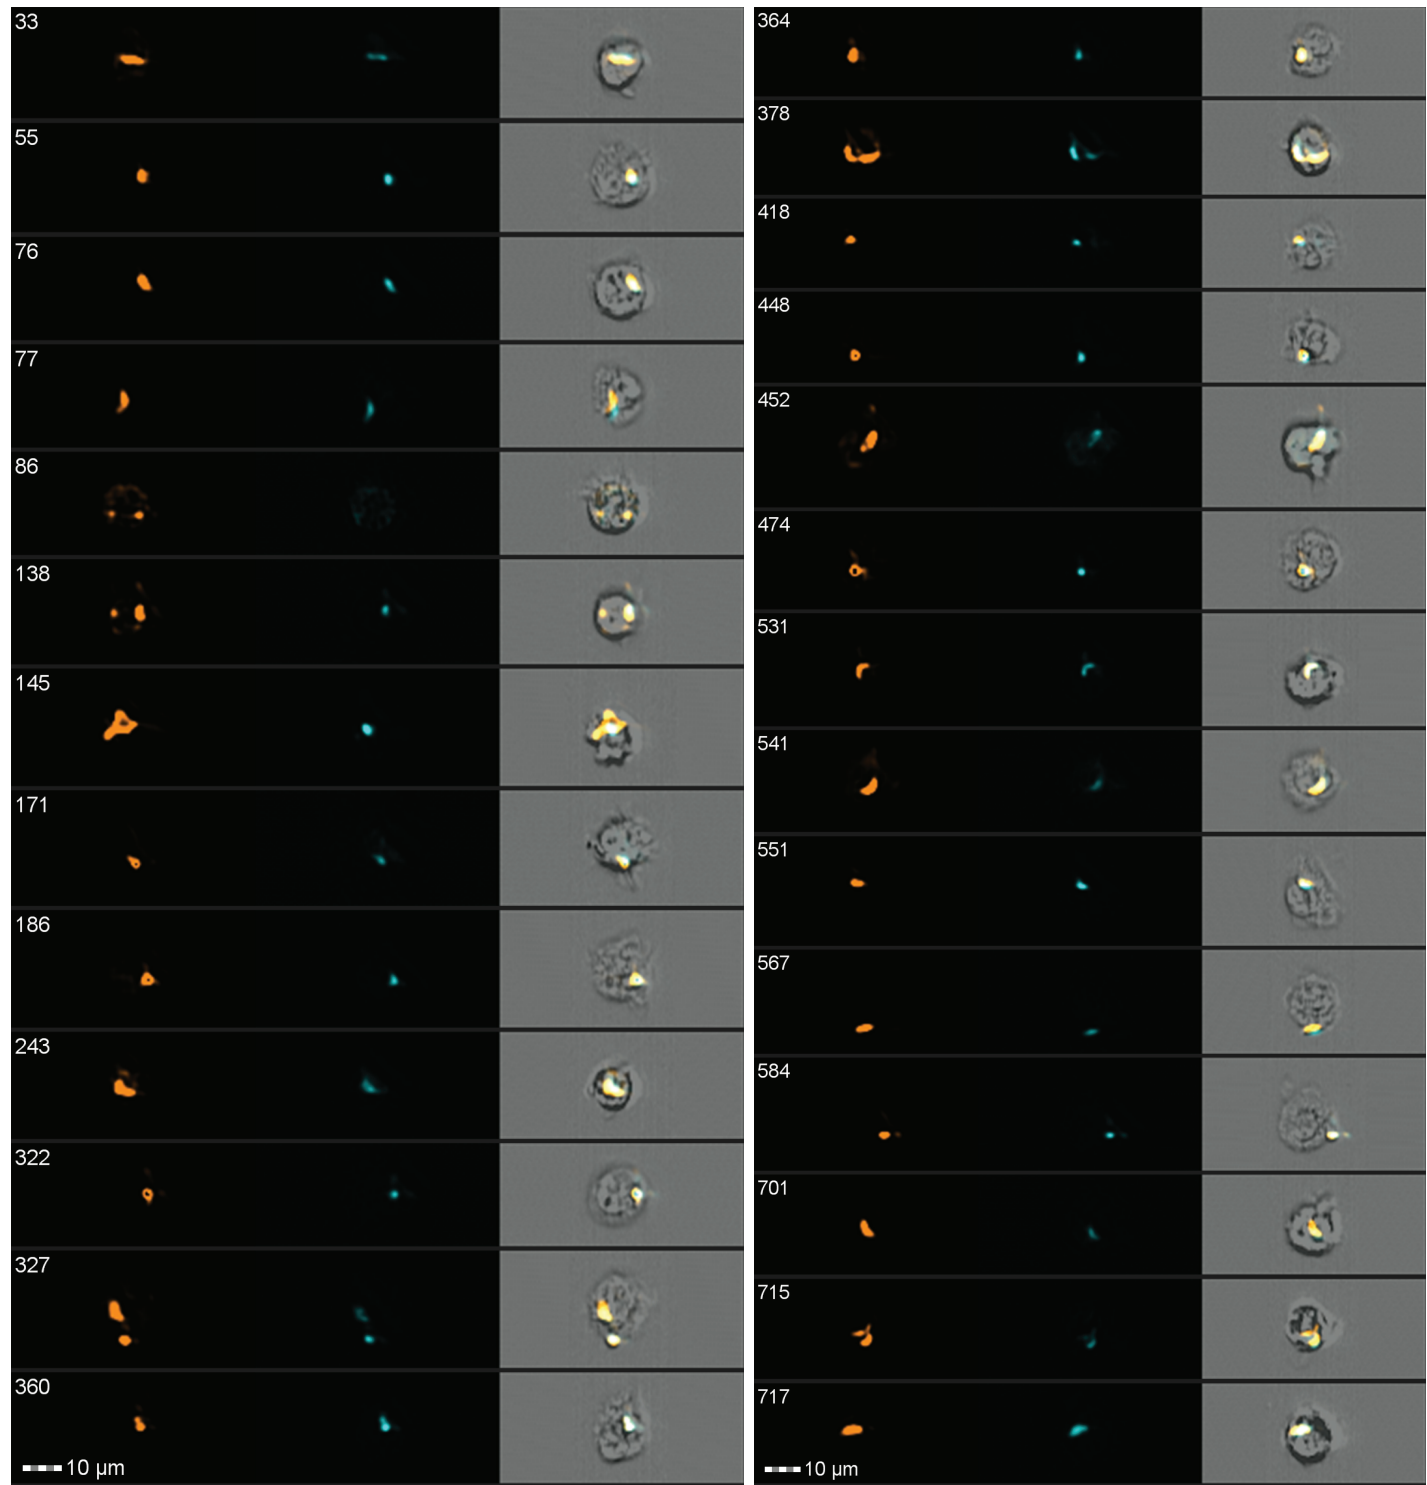

B mCherry+Violet- (Utx)

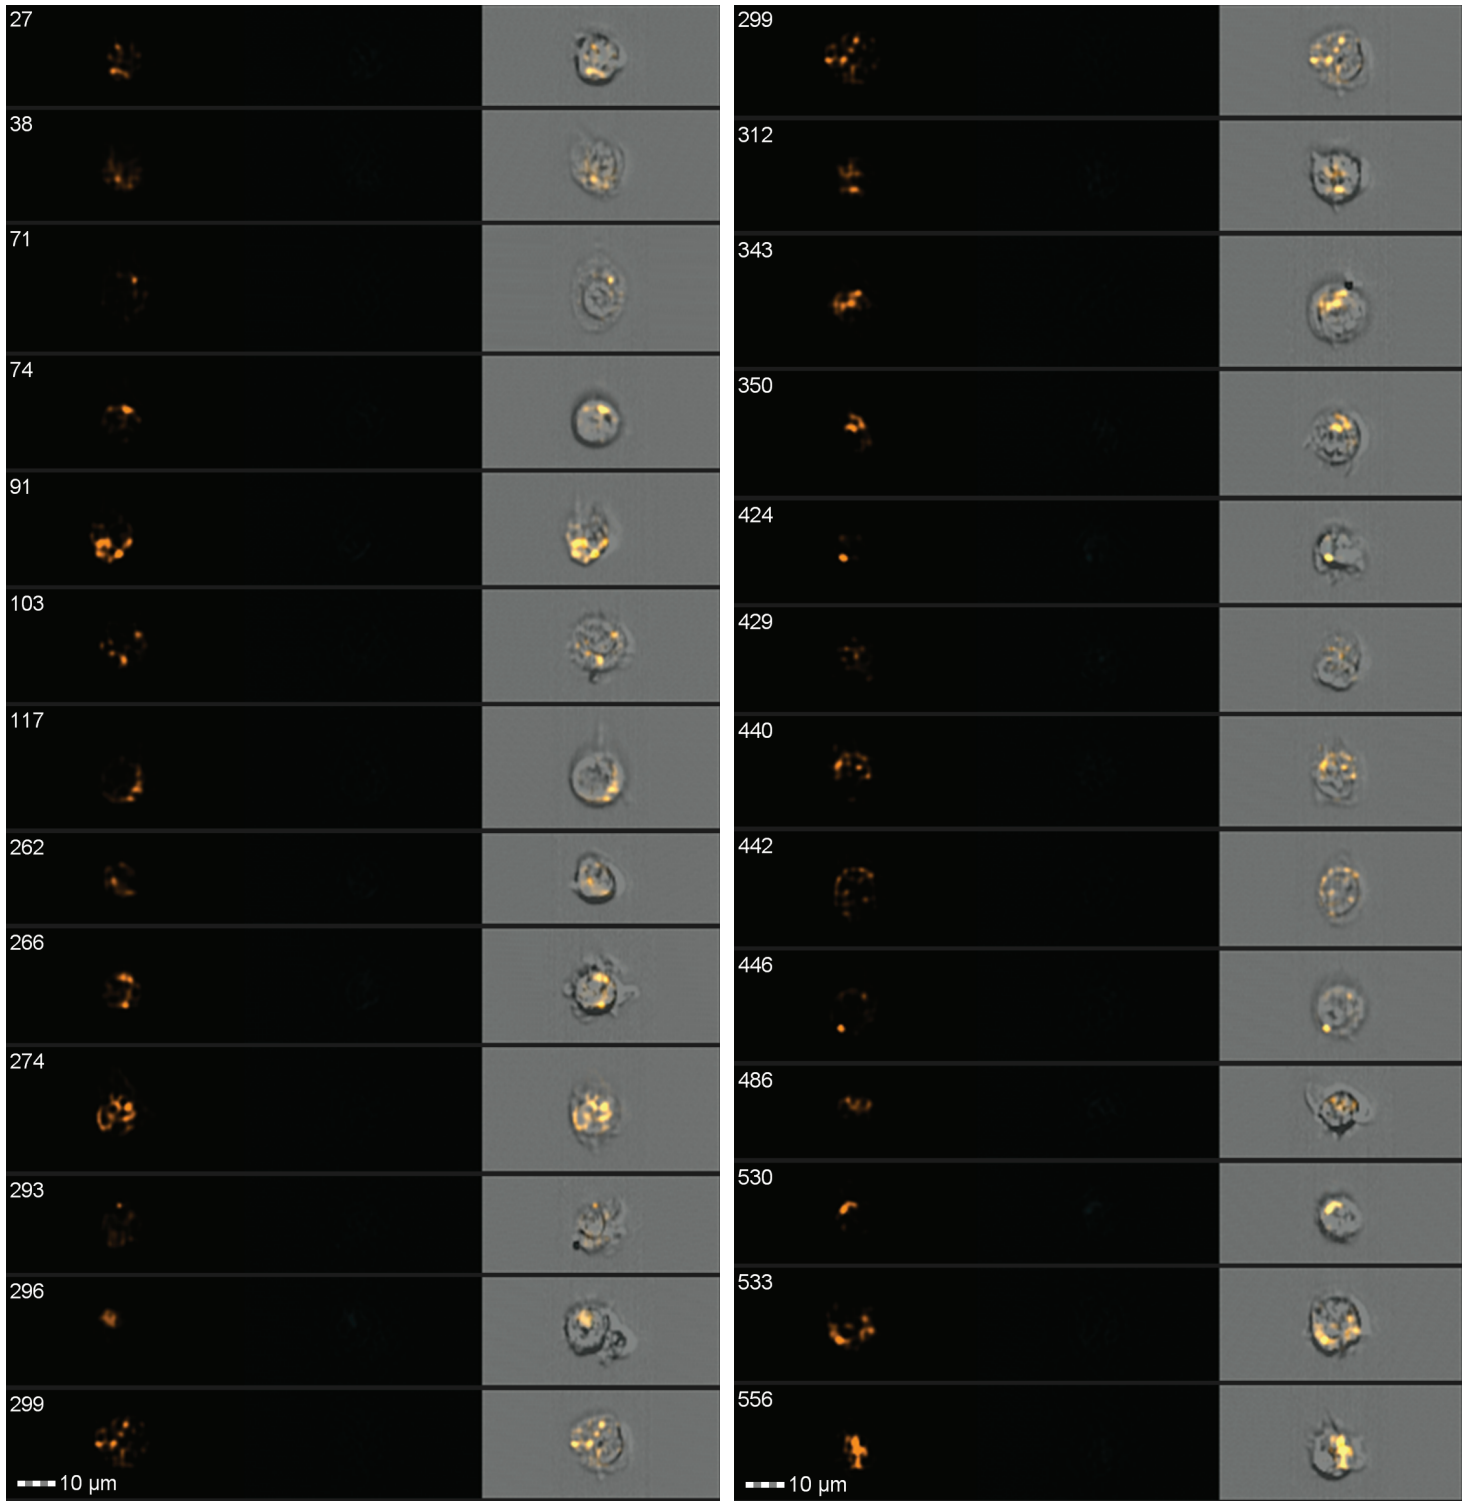

C mCherry+Violet- (4-p-bpb Tx)

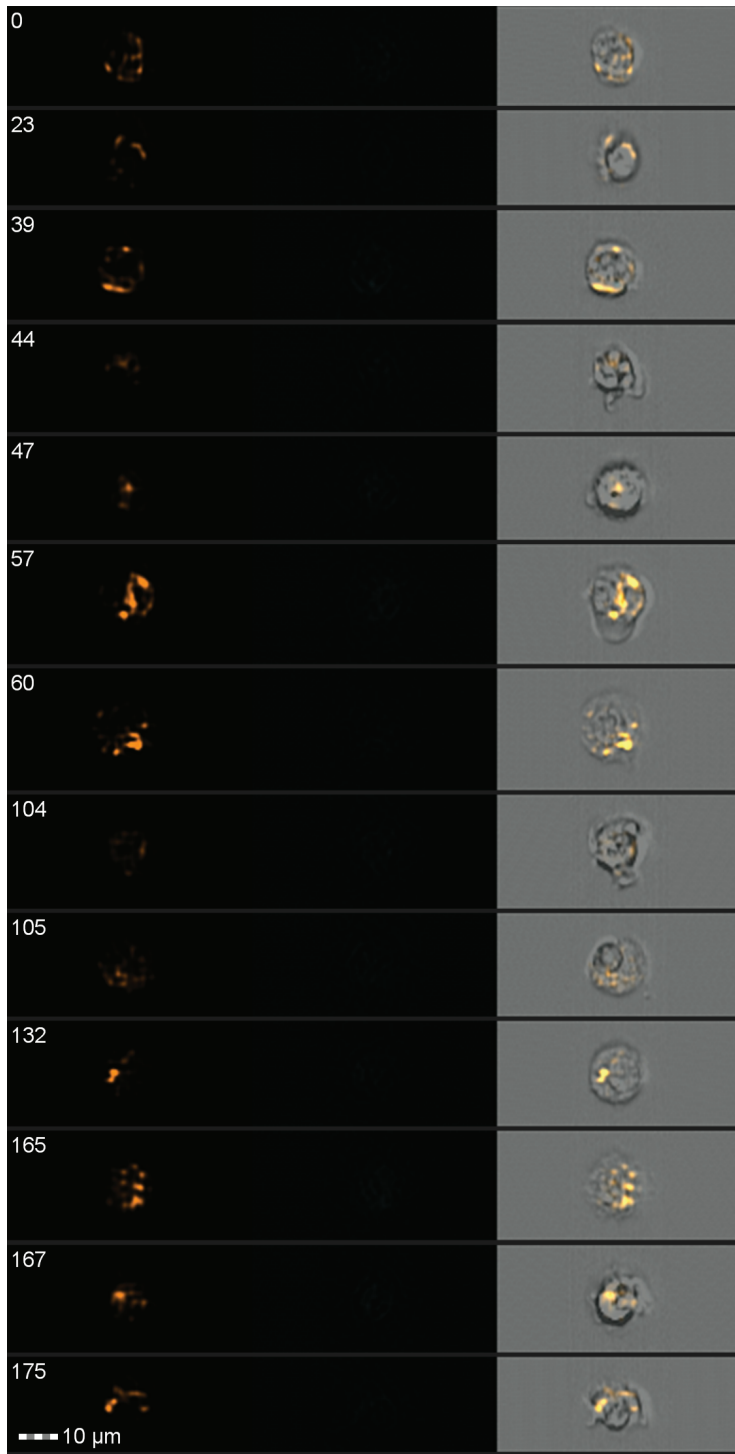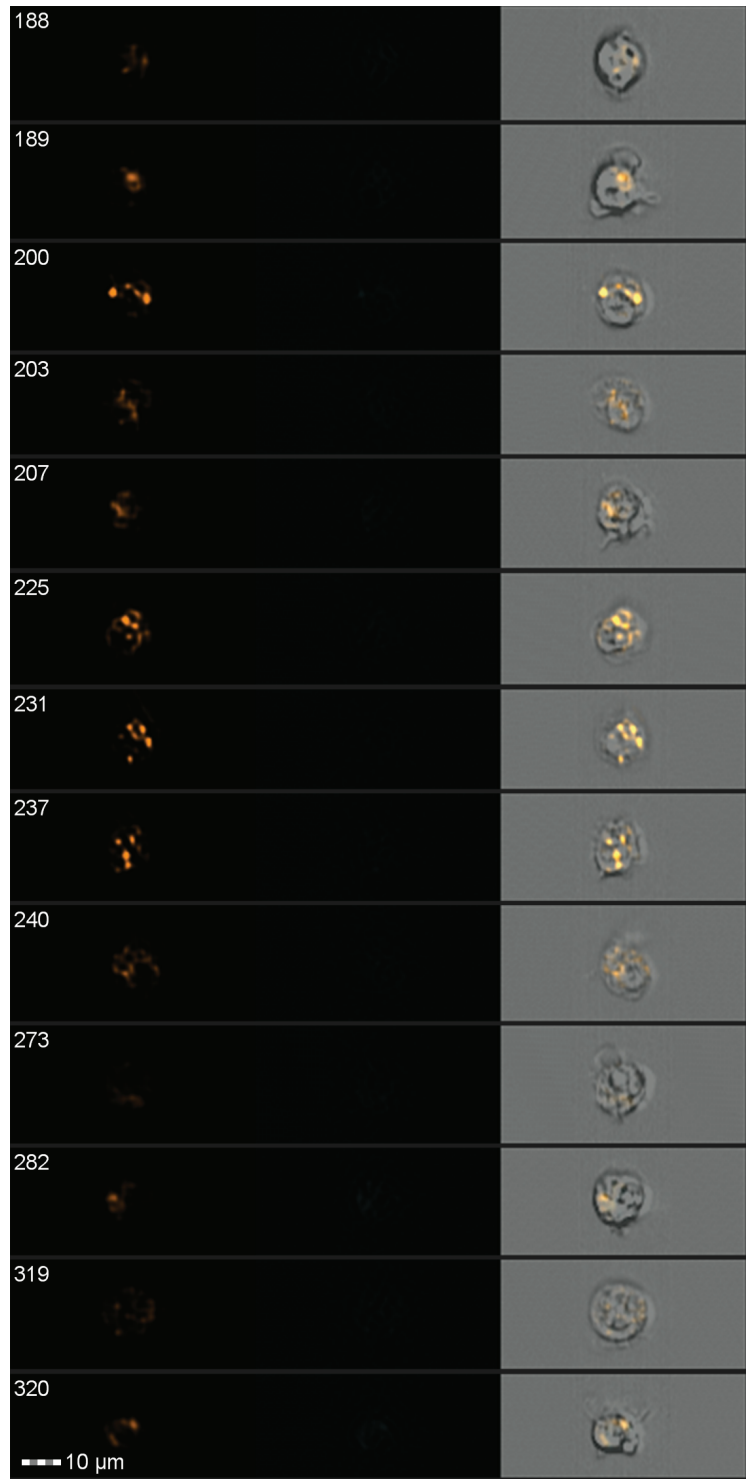

Supplement: ppat.1004047.s001.pdf [file ppat.1004047.s001.pdf]
