# Supplementary material for: Parasite Fate and Involvement of Infected Cells in the Induction of CD4+ and CD8+ T Cell Responses to Toxoplasma gondii
Source: PubMed Central journal article supplement (PMC3983043; doi:10.1371/journal.ppat.1004047), 2014-04-10

A

CD4<sup>+</sup> T cell responses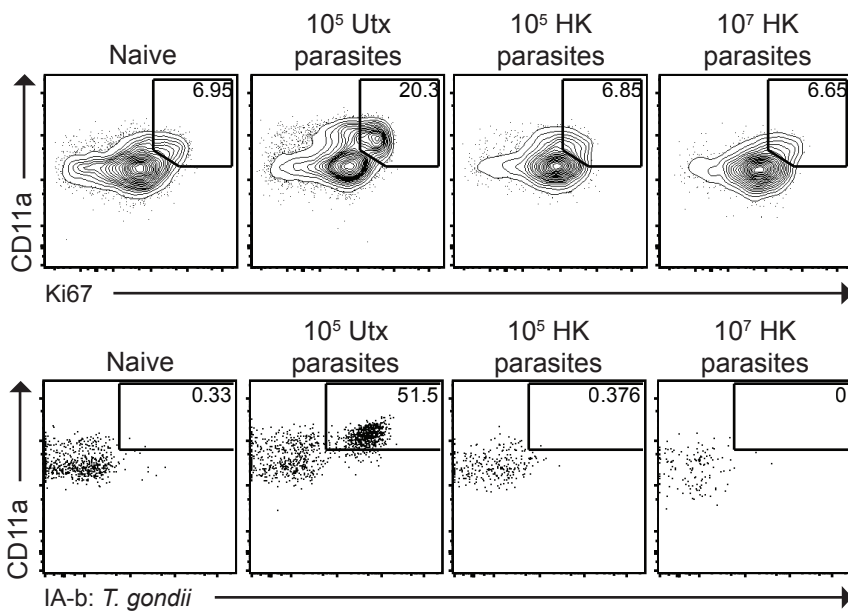

B

CD8<sup>+</sup> T cell responses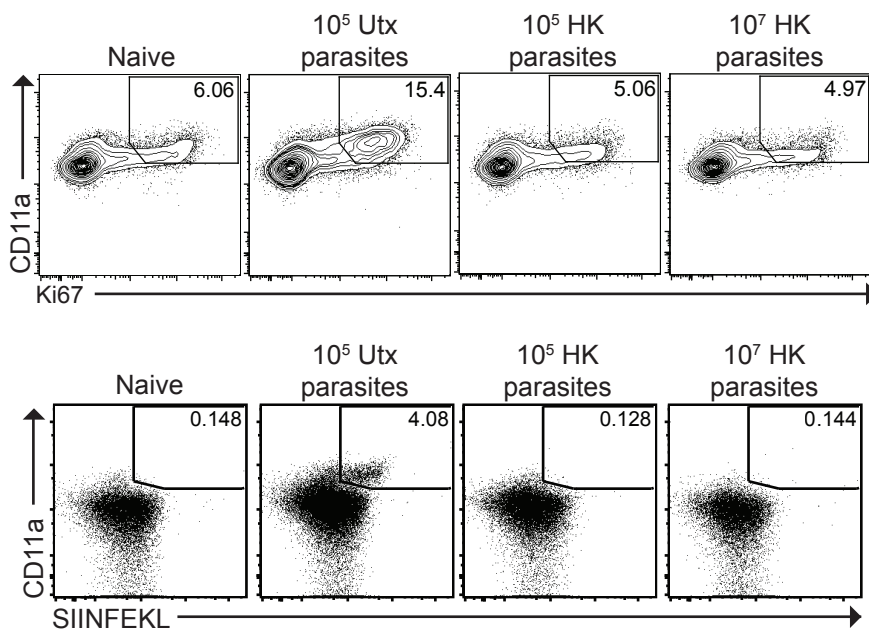

C

Parasite Burden in the peritoneal cavity 5 days post-challenge with virulent *T. gondii* (RH strain)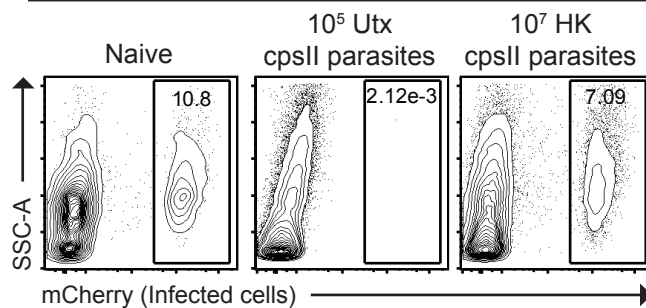

Supplement: ppat.1004047.s007.pdf [file ppat.1004047.s007.pdf]
